# Supplementary figures and images for: The effect of DPP-4-protected GLP-1 (7–36) on coronary microvascular function in obese adults
Source: PubMed Central journal article supplement — Int J Cardiol Heart Vasc. 2019 Jan 29;22:139–44. doi: 10.1016/j.ijcha.2019.01.004 (PMC6356020; doi:10.1016/j.ijcha.2019.01.004), 2019-01-29

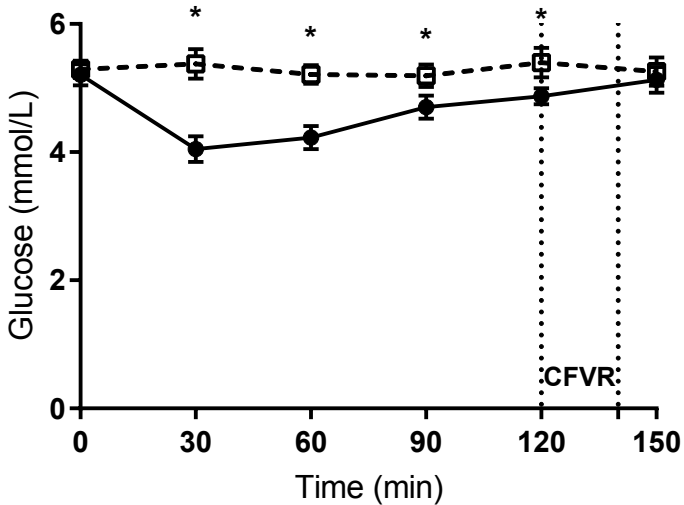

● GLP-1  
■ PLACEBO

CFVR

Supplement: mmc1.pdf [file mmc1.pdf]
